# Supplementary material
Source: PubMed Central journal article supplement (PMC6397671)
Supplement: NIHMS1004774-supplement-Supp_Data_Figures.pdf [file NIHMS1004774-supplement-Supp_Data_Figures.pdf]

**DATA SUPPLEMENT - APPENDIX**

**FIGURES AND TABLES**

## Data Supplement, Figure A1

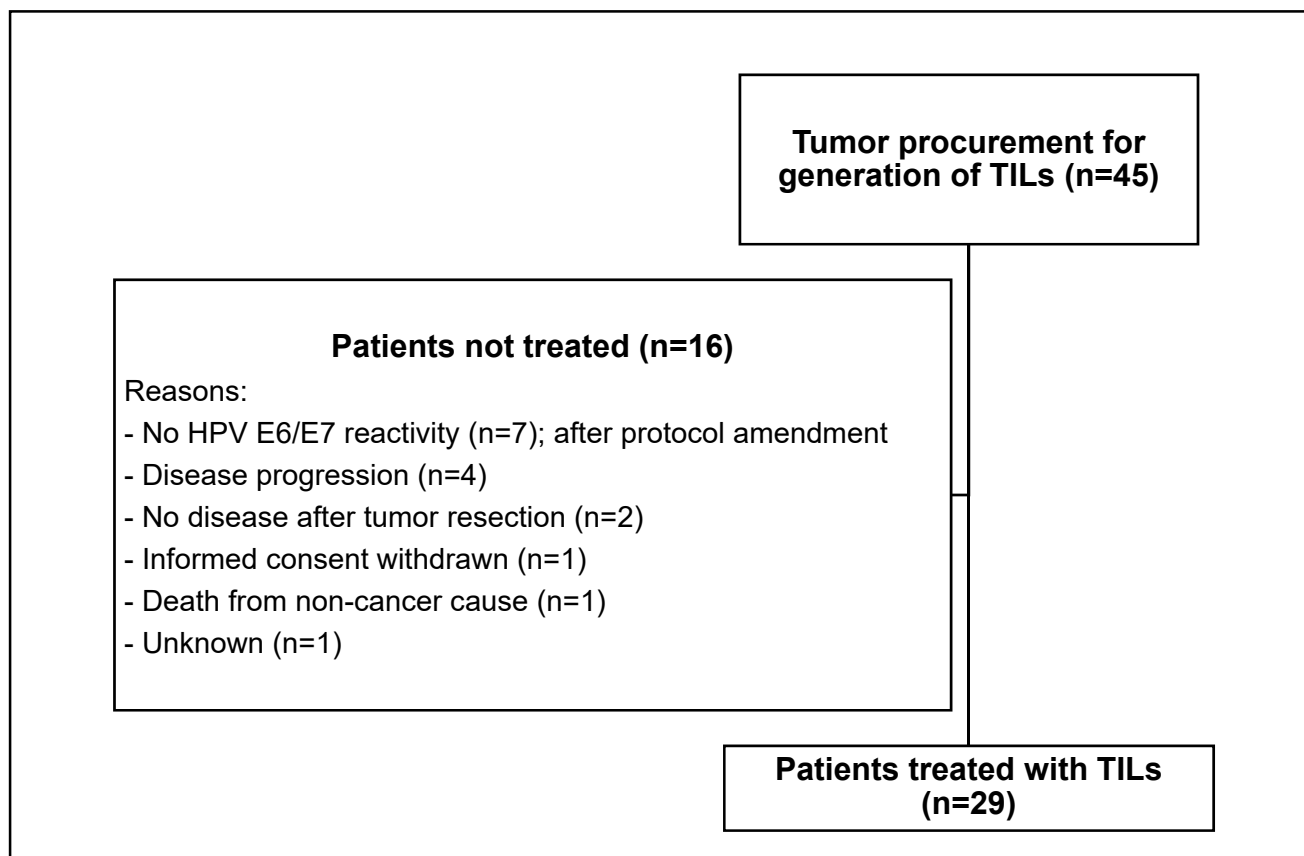

**Fig A1.** Trial diagram. Surgery for tumor procurement and generation of tumor-infiltrating lymphocytes (TILs) was performed for 45 patients. Sixteen patients were not treated for above indicated reasons. A total of 29 patients were treated with TILs.

## Data Supplement, Figure A2

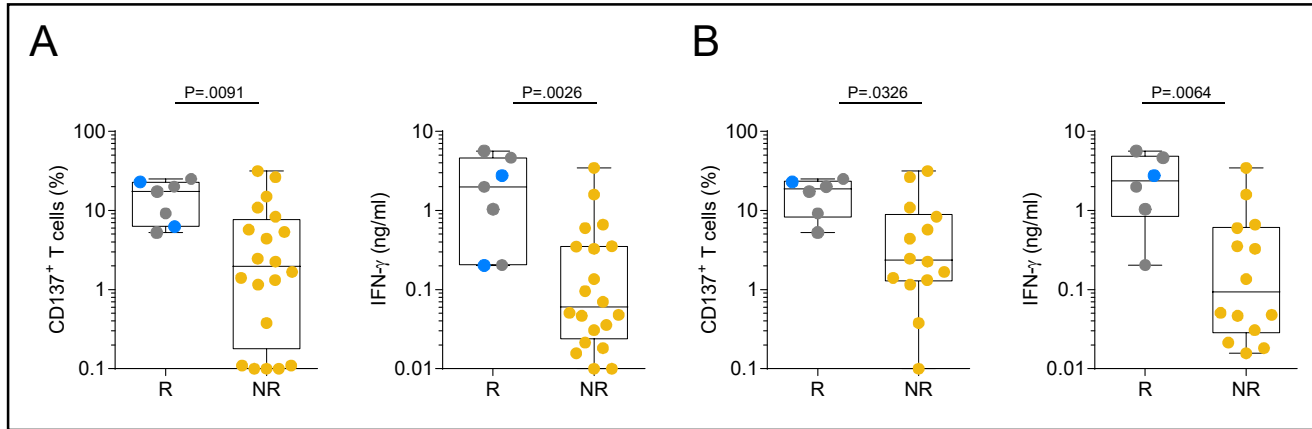

**Fig A2. HPV-reactivity of administered TILs from responding and nonresponding patients.** (A) Frequency of T cells upregulating CD137 (*Left*) and magnitude of interferon gamma (IFN- $\gamma$ ) release (*Right*) in infused TILs from responding (n=7) and nonresponding (n=20) patients. (B) Frequency of T cells upregulating CD137 (*Left*) and magnitude of IFN- $\gamma$  release (*Right*) in infused TILs from responding (n=6) and nonresponding (n=14) patients who would have met the amended criteria for treatment in retrospective analysis based on HPV-reactivity in TIL subcultures. One patient who experienced a complete response is not shown in panel B as the TIL demonstrated HPV reactivity in fewer than three subcultures. R, responding patients (objective complete or partial response); NR, nonresponding patients (no objective tumor response). Color denotes type of tumor response (blue, complete response; grey, partial response; gold, no response). Box and whisker plots show median (line), first and third quartiles, and minimum and maximum values. The Mann-Whitney U test was used to test for correlations between the responding and nonresponding patients. Reported P values are two tailed and not adjusted for multiple comparisons. P values < .05 were considered statistically significant.

Data Supplement, Figure A3

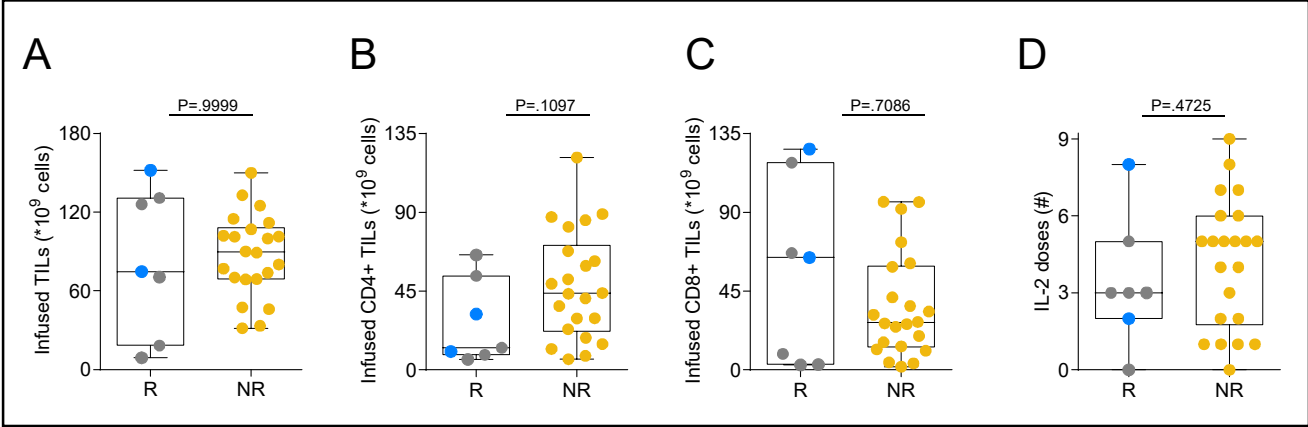

**Fig A3. Characteristics of administered TILs in responding and nonresponding patients.** (A) Number of CD3<sup>+</sup> T cells infused. (B) Number of CD4<sup>+</sup> T cells infused. (C) Number of CD8<sup>+</sup> T cells infused. (D) Number of IL-2 doses administered. R, responding patients (objective complete or partial response; n=7); NR, nonresponding patients (no objective tumor response; n=22). Color denotes type of tumor response (blue, complete response; grey, partial response; gold, no response). Box and whisker plots show median (line), first and third quartiles, and minimum and maximum values. The Mann-Whitney U test was used to test for correlations between responding and nonresponding patients. Reported P values are two tailed and not adjusted for multiple comparisons. P values < .05 were considered statistically significant.

Data Supplement, Figure A4

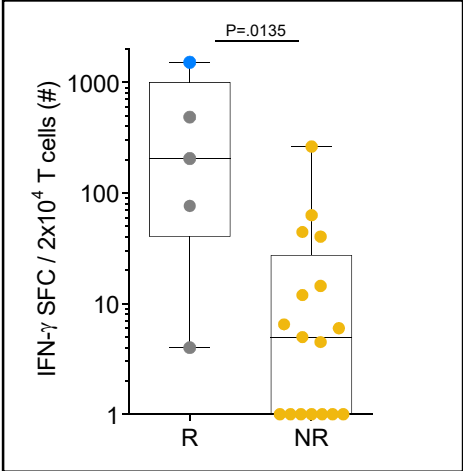

**Fig A4. HPV-reactivity in peripheral blood T cells after treatment in responding versus nonresponding patients.** Peripheral blood T cells one-month after treatment were assessed by IFN- $\gamma$  enzyme-linked immunospot assay for reactivity against HPV-oncoproteins in 5 responding (R) and 17 nonresponding (NR) patients (Figure 2C). Color denotes type of tumor response (blue, complete response; grey, partial response; gold, no response). Box and whisker plots show median (line), first and third quartiles, and minimum and maximum values. The Mann-Whitney U test was used to test for correlations between the responding and nonresponding patients. Reported P values are two tailed and not adjusted for multiple comparisons. P values < .05 were considered statistically significant. SFC, spot-forming cells.

# Data Supplement, Figure A5

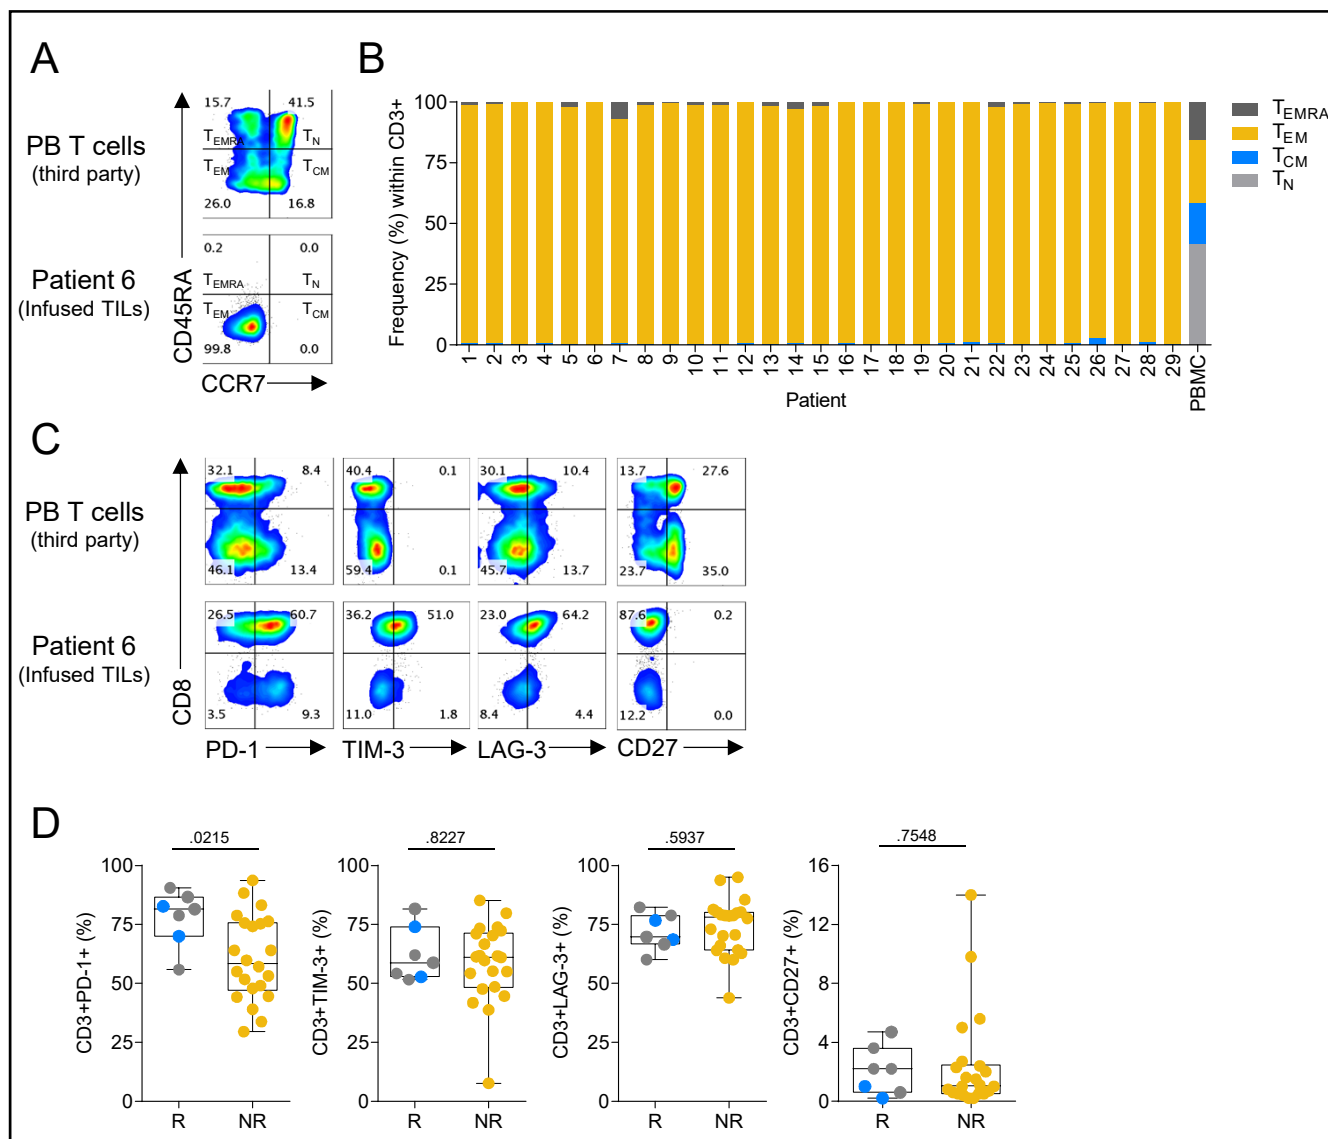

**Fig A5. Phenotype of administered TILs in responding and nonresponding patients.** (A) Example of flow cytometric staining for CD45RA and CCR7 on infused TILs from Patient 6 and third party peripheral blood T cells (PB T cells) defining naïve ( $T_N$ ,  $CD45RA^+CCR7^+$ ), central memory ( $T_{CM}$ ,  $CD45RA^+CCR7^+$ ), effector memory ( $T_{EM}$ ,  $CD45RA^+CCR7^-$ ) and terminally differentiated effector memory ( $T_{EMRA}$ ,  $CD45RA^+CCR7^-$ ) T cell subsets. Cells are pre-gated on live,  $CD3^+$  T cells. (B) Frequency of  $T_N$  (grey),  $T_{CM}$  (blue),  $T_{EM}$  (gold) and  $T_{EMRA}$  (dark grey) T cell subsets in infused TILs as assessed in A. Third party PB T cells are shown as PBMC. (C) Example of flow cytometric staining for PD-1, TIM-3, LAG-3 and CD27 infused TILs from Patient 6 and third party peripheral blood T cells (PB T cells). Cells are pre-gated on live,  $CD3^+$  T cells. (D) Frequency of PD-1<sup>+</sup>, TIM-3<sup>+</sup>, LAG-3<sup>+</sup> or CD27<sup>+</sup> within  $CD3^+$  T cells is shown. R, responding patients (objective complete or partial response; n=7); NR, nonresponding patients (no objective tumor response; n=22). Color denotes type of tumor response (blue, complete response; grey, partial response; gold, no response). Box and whisker plots show median (line), first and third quartiles, and minimum and maximum values. The Mann-Whitney U test was used to test for correlations between responding and nonresponding patients. Reported P values are two tailed and not adjusted for multiple comparisons.

## Data Supplement, Figure A6

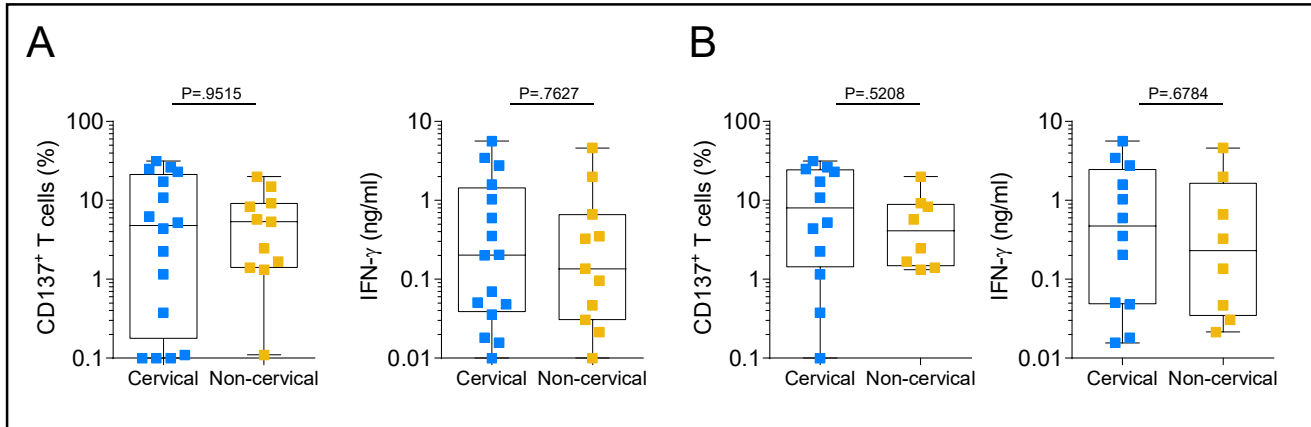

**Fig A5. HPV-reactivity of infused TILs in the cervical versus non-cervical cancer cohort.** (A) Frequency of T cells upregulating CD137 (*Left*) and magnitude of interferon gamma (IFN-gamma) release (*Right*) in infused TILs from evaluable patients (n=27) from the cervical cancer cohort (n=16) and the non-cervical cancer cohort (n=11). (B) Frequency of T cells upregulating CD137 (*Left*) and magnitude of IFN-gamma release (*Right*) in infused TILs from 20 patients (n=12 from the cervical cancer cohort and n=8 from the non-cervical cancer cohort) who, in retrospective analysis, would have met the amended criteria for treatment based on HPV-reactivity in TIL subcultures. Color denotes cohort (blue, cervical cancer cohort; gold, non-cervical cancer cohort). Box and whisker plots show median (line), first and third quartiles, and minimum and maximum values. The Mann-Whitney U test was used to test for correlations between the two cohorts. Reported P values are two tailed and not adjusted for multiple comparisons. P values < .05 were considered statistically significant.

Data Supplement, Figure A7

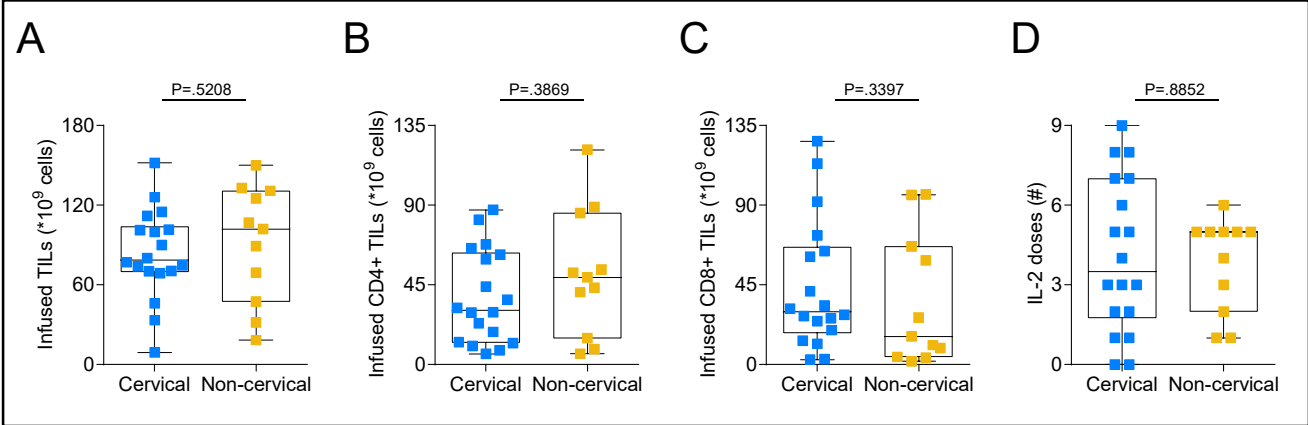

**Fig A6.** Characteristics of administered TILs in the cervical versus non-cervical cancer cohort. (A) Number of CD3<sup>+</sup> T cells infused. (B) Number of CD4<sup>+</sup> T cells infused. (C) Number of CD8<sup>+</sup> T cells infused. (D) Number of IL-2 doses administered. Color denotes cohort (blue, cervical cancer cohort (n=18); gold, non-cervical cancer cohort (n=11)). Box and whisker plots show median (line), first and third quartiles, and minimum and maximum values. The Mann-Whitney U test was used to test for correlations between the two cohorts. Reported P values are two tailed and not adjusted for multiple comparisons. P values < .05 were considered statistically significant.
