# Supplementary material
Source: PubMed Central journal article supplement (PMC6397671)
Supplement: NIHMS1004774-supplement-Supp_Data_Text.pdf [file NIHMS1004774-supplement-Supp_Data_Text.pdf]

Table 2

| Table 2: Adverse Events (grades 3 and 4) |                     |
|------------------------------------------|---------------------|
| Adverse Event                            | No. of Patients (#) |
| Lymphopenia                              | 29                  |
| Neutropenia                              | 29                  |
| Thrombocytopenia                         | 29                  |
| Anemia                                   | 25                  |
| Infection*                               | 17                  |
| Febrile neutropenia                      | 12                  |
| Metabolic disorders                      | 12                  |
| Hypoxia                                  | 8                   |
| Nausea/vomiting                          | 6                   |
| Dyspnea                                  | 4                   |
| Diarhea                                  | 3                   |
| Fatigue                                  | 3                   |
| Hypotension                              | 3                   |
| Cystitis                                 | 2                   |
| Hemorrhage†                              | 2                   |
| Oliguria                                 | 2                   |
| Renal failure‡                           | 2                   |
| Syncope                                  | 2                   |
| Ureteral obstruction#                    | 2                   |
| Dysphagia                                | 1                   |
| Confusion                                | 1                   |

\* Includes positive surveillance blood cultures  
† Associated with radiation colitis in one patient and with an in-situ cervical carcinoma in one patient  
‡ Associated with progressing pelvic tumor in one patient  
# Associated with progressing pelvic tumors in two patients
